# Supplementary material for: Intracellular glycosyl hydrolase PslG shapes bacterial cell fate, signaling, and the biofilm development of Pseudomonas aeruginosa
Source: eLife. 2022 Apr 19;11:e72778. doi: 10.7554/eLife.72778 (PMC9075953; doi:10.7554/eLife.72778)
Supplement: Figure 1—source data 1. [file elife-72778-fig1-data1.xlsx]

## Sheet: Sheet1
Figure 1A source data	PSL production relative to PAO1
	0% arabinose			0.5% arabinose
PAO1	0.991558	1.02309	0.985349	1.00796	1.00805	0.989825
ΔpslG	0.18	0.25	0.27	0.33	0.31	0.3
ΔpslG::pslGE165Q, E276Q	0.205884	0.228139	0.265977	0.244502	0.257065	0.175876
PBAD-psl	0.175587	0.198691	0.175969	3.816	3.55363	4.07934
PBAD-psl ΔpslG	0.122136	0.128134	0.123869	1.08	1.16	1.18
PBAD-psl ΔpslG::pslG	0.0736658	0.0619877	0.0780929	3.257	3.32895	3.18556
PBAD-psl ΔpslG::pslGE165Q, E276Q	0.109824	0.240492	0.189418	1.09897	1.08542	1.05397
PBAD-psl ΔpslG attB::PBAD-pslG	0.170501	0.179103	0.185109	2.704	2.68781	2.72113
	Attachment (OD560)
	0% arabinose				0.5% arabinose
PAO1	0.582	0.567	0.706	0.618	0.674	0.701	0.754	0.674
ΔpslG	0.25	0.24	0.236	0.235	0.325	0.309	0.254	0.262
ΔpslG::pslGE165Q, E276Q	0.234	0.221	0.212	0.254	0.211	0.209	0.228	0.206
PBAD-psl	0.059	0.066	0.056	0.064	0.895	0.954	0.887	0.848
PBAD-psl ΔpslG	0.074	0.1	0.079	0.069	0.669	0.625	0.651	0.597
PBAD-psl ΔpslG::pslG	0.068	0.065	0.068	0.066	1.102	1.204	1.057	1.061
PBAD-psl ΔpslG::pslGE165Q, E276Q	0.051	0.051	0.051	0.061	0.657	0.581	0.547	0.698
PBAD-psl ΔpslG attB::PBAD-pslG	0.059	0.08	0.073	0.071	1.084	1.024	0.967	1.081
Figure 1B source data	Swimming diameter (cm)
	0% arabinose				0.5% arabinose
PAO1	3.404	3.44	3.659		3.369	3.494	3.567
PBAD-psl	3.567	3.683	3.792	3.434	3.374	3.366	3.564	3.272
PBAD-psl ΔpslG	3.5	3.317	3.744	3.601	2.598	2.495	2.852
PBAD-psl ΔpslG::pslG	3.284	3.617	3.675	3.371	3.82	3.543	3.596	3.865
PBAD-psl ΔpslG::pslGE165Q, E276Q	3.654	3.564	3.49079	3.585	2.792	2.867	2.869
