# Supplementary material for: Intracellular glycosyl hydrolase PslG shapes bacterial cell fate, signaling, and the biofilm development of Pseudomonas aeruginosa
Source: eLife. 2022 Apr 19;11:e72778. doi: 10.7554/eLife.72778 (PMC9075953; doi:10.7554/eLife.72778)
Supplement: Figure 2—source data 1. [file elife-72778-fig2-data1.xlsx]

## Sheet: Sheet1
Figure 2B Source data
	Biofilm biomass
PAO1	4.12523	3.07561	4.34256	4.03226	5.29895
ΔpslG	5.85293	3.24088	3.43938	2.79958	3.17382
	Maximum thickness
PAO1	14	18	17	16	15
ΔpslG	19	18	20	20	21	21
Figure 2C Sourece data
	ePsl
PAO1	4.8851	4.29045	4.3582	3.97515	4.85753
ΔpslG	0.89549	0.49616	0.60584	1.90723	2.74841
