# Supplementary material for: Intracellular glycosyl hydrolase PslG shapes bacterial cell fate, signaling, and the biofilm development of Pseudomonas aeruginosa
Source: eLife. 2022 Apr 19;11:e72778. doi: 10.7554/eLife.72778 (PMC9075953; doi:10.7554/eLife.72778)
Supplement: Figure 3—source data 1. [file elife-72778-fig3-data1.xlsx]

## Sheet: Figure 3c
N	Number of pixels with N bacterial visits-PAO1	N	Number of pixels with N bacterial visits-△pslG	N	Number of pixels with N bacterial visits-△pslG::pslG	N	Number of pixels with N bacterial visits-△pslG::pslGE165Q,E276Q
2	28581	2	15878	2	26620	2	8765
4	2454	4	2412	4	1913	4	1844
6	568	6	805	6	470	6	938
8	205	8	385	8	172	8	583
10	94	10	217	10	84	10	399
12	50	12	143	12	39	12	282
14	21	14	108	14	28	14	183
16	17	16	68	16	15	16	146
18	9	18	56	18	16	18	99
20	5	20	37	20	8	20	77
22	4	22	35	22	7	22	65
24	2	24	23	24	7	24	55
26	1	26	16	26	4	26	44
28	1	28	12	28	3	28	33
30	1	30	11	30	5	30	27
42	1	42	6	32	2	32	21
60	1	60	2	34	1	34	18
62	1	62	2	36	1	36	15
66	1	66	1	38	1	38	12
70	1	70	3	40	2	40	12
114	1	114	1	42	2	42	9
				44	1	44	8
				46	2	46	5
				48	1	48	10
				52	1	50	4
				56	2	52	5
				58	1	54	4
				60	1	56	4
				62	1	58	1
				64	1	60	5
				66	1	62	5
				68	2	64	4
				72	1	66	2
				74	1	68	3
				80	1	70	1
				84	1	72	1
				88	1	74	2
				90	1	76	1
				92	1	78	1
				94	1	80	1
				100	1	82	1
				102	1	84	1
						86	1
						90	1
						92	1
						94	2
						110	1
