# Supplementary material for: Intracellular glycosyl hydrolase PslG shapes bacterial cell fate, signaling, and the biofilm development of Pseudomonas aeruginosa
Source: eLife. 2022 Apr 19;11:e72778. doi: 10.7554/eLife.72778 (PMC9075953; doi:10.7554/eLife.72778)
Supplement: Figure 3—source data 2. [file elife-72778-fig3-data2.xlsx]

## Sheet: Figure 3c
	Number of pictures	Mean	SD
PAO1	14	1.93	0.58
△pslG	43	4.1	0.65
△pslG::pslG	52	1.87	0.26
△pslG::pslGE165Q,E276Q	51	3.47	0.49
raw data
PAO1	0	0	3	5	1	2	4	4	1	1	5	0	1	0
△pslG	5	4	7	5	7	0	5	5	5	4	4	7	6	6	6	7	1	3	4	4	6	3	1	3	6	7	2	4	6	3	6	6	3	2	5	1	5	4	4	2	0	1	1
△pslG::pslG	4	4	3	4	0	0	1	4	4	4	2	3	4	2	0	0	0	0	0	1	0	0	0	0	2	0	0	0	1	1	0	2	0	4	3	4	2	2	3	1	4	0	4	1		0	3	5	3
△pslG::pslGE165Q,E276Q	5	6	4	4	5	4	1	4	1	5	4	5	5	1	1	3	1	1	4	4	0	2	2	2	3	6	3	1	2	3	3	0	2	3	7	4	0	3	7	0	6	6	5	4	5	9	3	4	4
[truncated: 4 more columns]
