# Supplementary material for: Intracellular glycosyl hydrolase PslG shapes bacterial cell fate, signaling, and the biofilm development of Pseudomonas aeruginosa
Source: eLife. 2022 Apr 19;11:e72778. doi: 10.7554/eLife.72778 (PMC9075953; doi:10.7554/eLife.72778)
Supplement: Figure 4—source data 1. [file elife-72778-fig4-data1.xlsx]

## Sheet: Figure 4B
	PBAD-psl△pslG single cell			PBAD-psl△pslG chain cell			△pslG single cell			△pslG chain cell
Time (h)	Number of pictures	Mean-Fraction	SD	Number of pictures	Mean-Fraction	SD	Number of pictures	Mean-Fraction	SD	Number of pictures	Mean-Fraction	SD
0	15	1	0.1	15	0	0	14	1	0.05	14	0	0
2	15	0.69	0.18	15	0.31	0.08	16	0.66	0.17	16	0.36	0.09
4	29	0.43	0.08	29	0.57	0.11	27	0.58	0.11	27	0.42	0.08
6	29	0.51	0.09	29	0.49	0.09	30	0.61	0.11	30	0.43	0.08
raw data
PBAD-psl△pslG
0h		2h		4h		6h
single cell	chain cell	single cell	chain cell	single cell	chain cell	single cell	chain cell
4	0	6	22	14	39	3	3
3	0	2	0	19	20	130	100
3	0	7	12	46	20	63	87
2	0	7	4	31	32	53	90
6	0	11	11	44	50	36	105
3	0	30	0	21	10	56	50
6	0	13	0	23	27	79	33
9	0	13	0	8	27	80	119
4	0	27	12	18	24	110	49
5	0	12	0	25	15	47	23
6	0	2	4	18	24	54	64
1	0	12	13	10	15	40	39
2	0	4	4	10	12	52	57
2	0	8	4	17	35	24	23
6	0	12	0	11	15	24	23
				12	23	25	25
				30	70	27	25
				43	46	24	23
				37	54	25	25
				24	24	23	44
				26	35	29	56
				5	15	4	4
				28	25	4	4
				18	36	11	8
				26	24	16	6
				30	55	27	25
				12	33	27	25
				7	30	25	25
				30	16	75	40
△pslG
0h		2h		4h		6h
single cell	chain cell	single cell	chain cell	single cell	chain cell	single cell	chain cell
3	0	5	28	44	77	136	179
5	0	15	0	87	0	260	16
3	0	3	8	11	12	58	32
6	0	6	0	19	0	66	20
2	0	5	0	2	9	51	21
2	0	4	0	66	54	13	26
7	0	5	10	10	3	30	14
2	0	6	0	2	0	2	3
3	0	2	0	14	20	120	179
1	0	0	8	16	16	60	16
1	0	4	0	4	14	38	32
1	0	1	4	12	4	55	20
3	0	2	0	15	15	45	21
2	0	0	8	18	15	43	26
		2	0	17	49	81	54
		7	4	11	8	20	14
				12	5	10	15
				1	3	26	9
				9	11	27	14
				6	7	26	9
				10	4	27	14
				14	15	51	54
				9	5	20	14
				10	5	6	15
				50	20	14	10
				10	17	5	5
				4	0	30	20
						5	0
						30	44
						9	4
