# Supplementary material for: Intracellular glycosyl hydrolase PslG shapes bacterial cell fate, signaling, and the biofilm development of Pseudomonas aeruginosa
Source: eLife. 2022 Apr 19;11:e72778. doi: 10.7554/eLife.72778 (PMC9075953; doi:10.7554/eLife.72778)
Supplement: Figure 4—source data 2. [file elife-72778-fig4-data2.xlsx]

## Sheet: Figure 4C
	△pslG		PBAD-psl△pslG
cell number in a chain	Number of cases	△pslG	Number of cases	WFPA801△pslG
3	45	0.15	19	0.06
4	136	0.45	149	0.46
5	39	0.13	58	0.18
6	36	0.12	52	0.16
7	15	0.05	19	0.06
8	21	0.07	19	0.06
9	9	0.03	6	0.02
