# Supplementary material for: Intracellular glycosyl hydrolase PslG shapes bacterial cell fate, signaling, and the biofilm development of Pseudomonas aeruginosa
Source: eLife. 2022 Apr 19;11:e72778. doi: 10.7554/eLife.72778 (PMC9075953; doi:10.7554/eLife.72778)
Supplement: Figure 6—source data 1. [file elife-72778-fig6-data1.xlsx]

## Sheet: Figure 6B
	PAO1			△pslG			PBAD-psl△pslG
	Number of cases	Mean-Relative Frequency (%)	SD	Number of cases	Mean-Relative Frequency (%)	SD	Number of cases	Mean-Relative Frequency (%)	SD
None-bright	104	59.77	4.53	97	57.73	4.45	57	52.29	5.1
One-bright	51	29.31	2.22	43	25.59	1.97	33	30.28	3
Two-bright	19	10.92	0.83	28	16.67	1.29	19	17.43	1.7
