# Supplementary material for: La psiquiatría en el hospital general.
Source: eLife journal article supplement (doi:10.7554/elife.72778), 1986-01-01
Supplement: supp [file elife_poa_e72778_Figure_7_source_data_1.xlsx]

## Sheet: Sheet1
Figure 7A source data
	Flourescence intensity
Time (h)	PAO1 + PAO1/pCdrA::gfp					ΔPpsl + PAO1/pCdrA::gfp					ΔpslG + PAO1/pCdrA::gfp
1	62	112	79	86		68	93	91	70	96	89	74	117	85	98
2	129	86	107	74		122	106	77	64	97	84	86	87	79	94
3	121	90	98	152		99	126	90	107	122	94	99	106	126	108
4	182	169	147	195		175	189	195	221	178	145	168	162	175	161
5	278	253	286	265		260	308	325	298	314	257	269	327	288	243
6	492	470	518	536		432	458	462	528	437	467	501	585	540	494
7	829	832	886	895		677	744	747	759	712	896	919	1046	962	986
8	1223	1275	1341	1363		994	1044	1030	1108	1075	1407	1514	1665	1521	1583
9	1570	1703	1768	1791		1326	1322	1371	1389	1390	1867	1940	2042	1985	2055
10	1831	2082	2052	2051		1537	1551	1612	1724	1635	2217	2328	2439	2335	2456
11	2099	2333	2312	2311		1736	1705	1834	1829	1843	2587	2604	2806	2765	2846
12	2290	2509	2543	2475		1853	1842	1967	1966	1915	2768	2846	3017	3004	2951
13	2507	2650	2704	2601		1962	1926	2073	2180	2085	3002	2993	3155	3305	3205
14	2733	2876	2854	2805		2051	2034	2213	2226	2174	3449	3187	3344	3511	3458
15	2861	2977	3030	2856		2160	2053	2310	2320	2274	3361	3296	3454	3545	3521
16	2974	3115	3110	3058		2222	2163	2455	2449	2348	3699	3304	3476	3485	3477
17	3097	3219	3320	3167		2342	2253	2539	2584	2516		3550	3736	3673	3733
18	3207	3289	3354	3295		2449	2338	2581	2610	2555	3716	3521	3756	3689	3624
19	3334	3459	3516	3326		2504	2407	2724	2749	2646	3746	3666	3849	3866	3730
20	3400	3642	3654	3648		2542	2428	2784	2847	2654	4015	3852	4064	4108	4007
21	3598	3801	3875	3803		2608	2418	2816	2900	2807	4112	3899	4090	4091	4025
22	3670	4052	3790	3950		2612	2410	2840	2975	2846	4192	3965	4302	4167	4122
23	4093	4100	4242	4054		2673	2359	2905	2985	2935	4526	4509	4538	4542	4395
Growth (OD600)
Time (h)	PAO1 + PAO1/pCdrA::gfp					ΔPpsl + PAO1/pCdrA::gfp					ΔpslG + PAO1/pCdrA::gfp
1	0.094	0.095	0.094	0.095	0.095	0.102	0.096	0.095	0.096	0.094	0.089	0.092	0.09	0.09	0.092
2	0.102	0.102	0.102	0.103	0.102	0.117	0.105	0.104	0.108	0.105	0.095	0.098	0.095	0.096	0.097
3	0.126	0.129	0.127	0.131	0.128	0.166	0.138	0.143	0.142	0.136	0.121	0.123	0.12	0.125	0.125
4	0.205	0.216	0.216	0.232	0.216	0.346	0.247	0.256	0.267	0.239	0.179	0.192	0.185	0.192	0.186
5	0.391	0.409	0.399	0.415	0.395	0.594	0.492	0.495	0.509	0.507	0.338	0.365	0.372	0.353	0.344
6	0.548	0.563	0.571	0.577	0.552	0.792	0.678	0.681	0.7	0.694	0.502	0.524	0.553	0.488	0.466
7	0.711	0.733	0.748	0.773	0.73	0.972	0.823	0.828	0.86	0.865	0.631	0.642	0.682	0.611	0.589
8	0.889	0.921	0.935	0.963	0.911	1.104	0.94	0.946	0.978	0.968	0.753	0.778	0.8	0.751	0.714
9	1.032	1.06	1.071	1.098	1.058	1.217	1.045	1.053	1.1	1.063	0.859	0.878	0.903	0.847	0.825
10	1.138	1.158	1.166	1.185	1.15	1.301	1.127	1.121	1.136	1.125	0.915	0.925	0.974	0.934	0.907
11	1.194	1.205	1.213	1.226	1.194	1.351	1.198	1.195	1.205	1.161	0.979	0.985	1.034	1.005	0.994
12	1.235	1.24	1.247	1.257	1.233	1.393	1.339	1.243	1.274	1.222	1.054	1.085	1.106	1.071	1.036
13	1.264	1.271	1.282	1.292	1.261	1.441	1.297	1.405	1.287	1.275	1.133	1.162	1.172	1.132	1.089
14	1.293	1.295	1.311	1.317	1.292	1.478	1.337	1.345	1.359	1.315	1.146	1.201	1.216	1.135	1.14
15	1.321	1.329	1.356	1.363	1.331	1.511	1.355	1.349	1.356	1.355	1.193	1.217	1.255	1.156	1.182
16	1.361	1.374	1.39	1.39	1.356	1.552	1.381	1.378	1.372	1.471	1.23	1.265	1.285	1.216	1.215
17	1.383	1.399	1.424	1.415	1.377	1.599	1.412	1.453	1.438	1.463	1.201	1.289	1.32	1.295	1.303
18	1.439	1.418	1.45	1.442	1.441	1.671	1.509	1.423	1.423	1.482	1.216	1.315	1.331	1.318	1.327
19	1.437	1.471	1.479	1.47	1.429	1.626	1.455	1.436	1.437	1.456	1.278	1.385	1.395	1.348	1.436
20	1.486	1.458	1.482	1.532	1.462	1.639	1.483	1.453	1.45	1.468	1.315	1.4	1.395	1.364	1.447
21	1.505	1.501	1.501	1.571	1.512	1.661	1.471	1.459	1.46	1.513	1.31	1.405	1.409	1.381	1.458
22	1.529	1.5	1.487	1.576	1.484	1.677	1.509	1.472	1.464	1.489	1.327	1.446	1.426	1.341	1.453
23	1.53	1.51	1.493	1.587	1.499	1.704	1.526	1.476	1.472	1.499	1.354	1.506	1.44	1.411	1.464
Figure 7B source data
strains	Fluorescence intensity/OD600
PAO1 + PAO1/pCdrA::gfp	2499.15	2708.89	2751.89
ΔPpsl + PAO1/pCdrA::gfp	1888.94	1772.34	2192.65
ΔpslG + PAO1/pCdrA::gfp	2937.08	3234.69	2964.41
ΔpslG::pslGE165Q, E276Q + PAO1/pCdrA::gfp	3044.42	3005.98	3042.63
Figure 7C source data-PslG effect on PSL signal	Fluorescence intensity of PAO1/pCdrA::gfp
time (h)	0 nM PslG						10 nM PslG						50 nM PslG
0	108	121	165	132	125	98	144	158	143	115	134	143	138	119	136	137	144	134
1	107	121	103	96	130	134	131	145	121	128	137	158	138	119	147	110	127	82
2	128	126	120	119	139	126	137	140	113	130	160	148	175	129	182	182	137	179
3	173	138	181	136	148	166	199	213	166	160	206	165	179	190	213	162	215	185
4	260	261	290	279	250	225	302	301	285	299	317	302	318	277	312	271	318	295
5	486	459	628	380	390	490	410	488	426	453	491	486	502	417	466	456	428	489
6	724	773	1069	606	1475	1061	554	584	650	730	616	593	632	553	568	576	579	608
7	1029	1099	1612	1267	1898	1207	708	866	760	785	847	753	808	713	757	740	735	726
8	1381	1351	2074	1524	2068	1396	1116	1351	1528	1025	1072	941	971	879	869	909	830	873
9	1666	1763	2089	1506	2163	1859	1736	1275	1421	1317	1340	1148	1125	1039	1066	1042	986	1087
10	1893	2021	2045	1773	2392	2018	1397	1487	1646	1592	1644	1407	1368	1214	1225	1218	1161	1194
11	2105	2036	2068	2132	2097	2011	1614	1710	1786	1742	1752	1541	1474	1286	1364	1286	1266	1351
12	2124	2098	2135	2161	2130	2127	1683	1854	1918	1832	1926	1592	1554	1402	1381	1362	1329	1433
13	2272	2060	2196	2143	2160	2203	1770	1969	2017	1930	2016	1721	1670	1456	1448	1426	1401	1508
14	2345	2264	2255	2240	2236	2324	1833	2018	2063	1987	2096	1754	1610	1527	1491	1493	1450	1526
15	2410	2260	2341	2297	2335	2406	1940	2033	2112	2049	2140	1850	1722	1559	1548	1541	1514	1555
16	2471	2384	2465	2379	2399	2439	2000	2107	2198	2131	2189	1879	1723	1607	1541	1564	1546	1597
17	2565	2392	2534	2436	2539	2489	2055	2191	2278	2192	2290	1943	1806	1628	1627	1619	1544	1622
18	2679	2503	2574	2532	2532	2644	2122	2239	2343	2273	2381	2015	1860	1689	1664	1689	1651	1695
19	2749	2583	2637	2597	2600	2650	2211	2299	2389	2317	2447	2159	1940	1730	1721	1738	1712	1765
20	2971	2605	2700	2683	2707	2707	2249	2451	2448	2456	2492	2230	1963	1763	1727	1822	1758	1781
21	3079	2778	2818	2774	2775	2850	2389	2527	2562	2545	2613	2316	2103	1904	1826	1884	1859	1874
22	3172	2854	2877	2738	2755	2903	2461	2545	2749	2629	2659	2375	2095	1912	1905	1961	1935	1961
23	3289	3012	3001	3012	2880	3076	2496	2659	2723	2669	2768	2472	2053	1938	1922	1931	1936	1987
24	3433	2953	3073	3065	2955	3043	2589	2593	2825	2753	2797	2569	2037	1945	1928	1889	1938	1996
time (h)	OD600
0	0.091	0.094	0.095	0.093	0.093	0.091	0.094	0.096	0.099	0.095	0.096	0.095	0.097	0.094	0.096	0.096	0.097	0.097
1	0.097	0.097	0.1	0.098	0.096	0.096	0.101	0.106	0.102	0.105	0.105	0.106	0.106	0.101	0.106	0.105	0.105	0.106
2	0.113	0.114	0.119	0.113	0.114	0.112	0.128	0.13	0.13	0.13	0.129	0.133	0.134	0.127	0.134	0.134	0.133	0.135
3	0.161	0.164	0.176	0.162	0.158	0.155	0.199	0.203	0.191	0.195	0.198	0.203	0.21	0.195	0.208	0.21	0.21	0.213
4	0.288	0.303	0.345	0.303	0.294	0.295	0.383	0.392	0.351	0.364	0.378	0.37	0.395	0.369	0.401	0.404	0.4	0.414
5	0.51	0.534	0.589	0.515	0.511	0.543	0.585	0.594	0.564	0.568	0.583	0.594	0.606	0.579	0.607	0.615	0.603	0.622
6	0.674	0.683	0.733	0.665	0.797	0.761	0.732	0.738	0.715	0.712	0.738	0.748	0.762	0.734	0.763	0.775	0.742	0.765
7	0.817	0.852	0.918	0.831	0.942	0.871	0.89	0.821	0.82	0.828	0.852	0.866	0.891	0.863	0.897	0.886	0.893	0.896
8	0.939	0.982	1.077	0.961	1.105	1.035	1.072	1.089	0.964	0.983	0.975	0.96	0.985	0.962	0.998	0.985	0.984	1.01
9	1.051	1.143	1.185	1.061	1.212	1.169	1.275	1.084	1.095	1.096	1.158	1.069	1.08	1.072	1.09	1.088	1.088	1.094
10	1.127	1.225	1.24	1.157	1.289	1.248	1.186	1.299	1.178	1.184	1.254	1.161	1.157	1.133	1.148	1.143	1.16	1.165
11	1.177	1.247	1.275	1.281	1.3	1.263	1.263	1.26	1.259	1.275	1.248	1.236	1.188	1.194	1.203	1.209	1.225	1.217
12	1.194	1.247	1.296	1.291	1.322	1.283	1.294	1.298	1.283	1.288	1.27	1.241	1.24	1.238	1.25	1.244	1.257	1.264
13	1.214	1.272	1.302	1.313	1.339	1.319	1.324	1.332	1.32	1.322	1.317	1.275	1.277	1.286	1.294	1.279	1.297	1.3
14	1.247	1.32	1.33	1.338	1.349	1.352	1.338	1.345	1.339	1.353	1.339	1.299	1.306	1.311	1.336	1.308	1.337	1.334
15	1.28	1.35	1.359	1.36	1.383	1.382	1.364	1.373	1.356	1.36	1.358	1.326	1.329	1.337	1.362	1.339	1.368	1.371
16	1.314	1.372	1.382	1.378	1.418	1.412	1.392	1.396	1.384	1.382	1.381	1.355	1.362	1.371	1.402	1.378	1.394	1.405
17	1.329	1.42	1.415	1.403	1.448	1.421	1.415	1.418	1.406	1.399	1.399	1.383	1.379	1.398	1.408	1.398	1.418	1.42
18	1.356	1.415	1.458	1.428	1.502	1.442	1.426	1.438	1.415	1.407	1.412	1.409	1.401	1.425	1.432	1.418	1.442	1.447
19	1.369	1.443	1.485	1.462	1.471	1.462	1.454	1.467	1.442	1.424	1.433	1.44	1.409	1.436	1.447	1.432	1.456	1.458
20	1.386	1.452	1.472	1.473	1.486	1.493	1.472	1.474	1.456	1.462	1.443	1.456	1.415	1.444	1.458	1.436	1.466	1.472
21	1.404	1.492	1.486	1.487	1.5	1.515	1.484	1.507	1.479	1.52	1.46	1.475	1.417	1.446	1.464	1.438	1.472	1.481
22	1.425	1.482	1.531	1.527	1.516	1.545	1.502	1.497	1.488	1.476	1.484	1.482	1.411	1.442	1.468	1.433	1.473	1.482
23	1.436	1.499	1.519	1.51	1.521	1.526	1.508	1.509	1.534	1.478	1.488	1.498	1.401	1.437	1.462	1.429	1.469	1.484
24	1.438	1.509	1.532	1.546	1.533	1.538	1.521	1.535	1.506	1.493	1.494	1.508	1.388	1.425	1.458	1.422	1.46	1.479
Figure 7D source data-24h Fluorescence intensity of PAO1/pCdrA::gfp/OD600
PslG treatment	Fluorescence intensity/OD600
0 nM PslG	2387.34	1956.92	2005.88	1982.54	1927.59	1978.54
10 nM PslG	1702.17	1689.25	1875.83	1843.94	1872.15	1703.58
50 nM PslG	1467.58	1364.91	1322.36	1328.41	1327.4	1349.56
